# Supplementary material for: Tracking and recording of intracellular oxygen concentration changes in cell organelles: preparation and function of azide-modified fluorescent probes
Source: Royal Society of Chemistry journal article supplement (doi:10.1039/d4ra01625d), 2024-01-01
Supplement: d4ra01625d1.pdf [file d4ra01625d1.pdf]

## Supporting Information

Tracking and recording of intracellular oxygen concentration variations to cell organelles:  
Preparation and function of azide-modified fluorescent probes

Hiroki Makanai, Mieji Kanda, Sae Harada, Tatsuya Nishihara and Kazuhito Tanabe\*

Department of Chemistry and Biological Science, College of Science and Engineering, Aoyama  
Gakuin University, 5-10-1 Fuchinobe, Chuo-ku, Sagamihara, 252-5258, Japan

### Table of Contents

---

|                                    |                                                                               |     |
|------------------------------------|-------------------------------------------------------------------------------|-----|
| Additional Experimental Procedures |                                                                               | S2  |
| Figure S1                          | Activation and fluorescence of the probes under 10% O <sub>2</sub> conditions | S4  |
| Figure S2                          | Cytotoxicity of the probes                                                    | S5  |
| Figure S3                          | Fluorescence intensity of the probes (0-10 μM) in the cells                   | S6  |
| Figure S4                          | Emission image of A549 cells in the presence of the probes after oxygenation  | S7  |
| Figure S5                          | Emission image of HCT cells in the presence of the probes                     | S8  |
| Figure S6                          | Emission image of HEK293 cells in the presence of the probes                  | S9  |
| Figure S7                          | Deoxygenation of A549 cells                                                   | S10 |
| Figure S8                          | <sup>1</sup> H NMR of Hoechst-N <sub>3</sub>                                  | S11 |
| Figure S9                          | <sup>13</sup> C NMR of Hoechst-N <sub>3</sub>                                 | S12 |

---

## Additional Experimental Procedures

**General Methods.** Regents were purchased from Wako pure chemical industries, Tokyo chemical industries, Sigma Aldrich, and eurofins Genomics. Rat liver microsomes were purchased from Veritas. The course of reaction was monitored by Thin-layer chromatography on silica gel plates (Silica gel 60 F254). Wakogel 60 was used for silica gel column Chromatography. NMR spectra were recorded on a JNM-ECX500II ( $^1\text{H}$ : 500 MHz,  $^{13}\text{C}$ : 125 MHz) spectrometer (JEOL) and chemical shifts are expressed in ppm downfield from tetramethylsilane, using residual protons in the solvents as internal standards ( $\text{CDCl}_3$ :  $\delta$ 7.26 in  $^1\text{H}$  NMR,  $\delta$ 77.0 in  $^{13}\text{C}$  NMR,  $\text{DMSO-}d_6$ :  $\delta$ 2.49 in  $^1\text{H}$  NMR,  $\delta$ 39.5 in  $^{13}\text{C}$  NMR). FAB mass spectrometry was performed with a JMS-700A mass spectrometer (JEOL), using nitrobenzyl alcohol as a matrix. Fluorescence measurement was carried out on a FP-8300 spectrofluorophotometer (JASCO). UV-visible spectra were obtained at 400-1000nm using a JASCO V-630 UV/VIS spectrophotometer. The cells were incubated using  $\text{CO}_2$  incubator (MCO-18AIC, SANYO) at 37 °C in 5%  $\text{CO}_2$ . Cell observation were used by C2 confocal laser scanning microscope (Nikon). Hoechst-NH<sub>2</sub> (*J. Am. Chem. Soc.*, **1996**, *118*, 7055.) and Cy-N<sub>3</sub> (*Nanoscale*, **2018**, *10*, 13462.) were prepared according to the reported procedure.

**Cell culture.** A549, HCT116, and HEK293 cells were cultured in Dulbecco's Modified Eagle Medium (D-MEM) supplemented with 10 % fetal bovine serum (FBS), and 1 % penicillin-streptomycin. The cells were maintained at 37 °C in 5%  $\text{CO}_2$  and were kept in a logarithmic growth phase by routine passages every 3–4 days. Prior to the use of cells, the densities of cells were determined using a hemocytometer.

**Intracellular localization.** A549 was incubated with Cy-N<sub>3</sub> and mitotracker green as a mitochondria staining dye for 30 min. After the incubation, the medium was washed using DPBS two times, and then the cells were observed using a confocal laser scanning microscope. (Excitation wavelengths were 685 nm for Cy-N<sub>3</sub> and 488 nm for mitotracker green respectively). On the other hand, A549 was incubated with Hoechst-N<sub>3</sub> for 30 min and the medium was washed using DPBS. After washing, the A549 cell was further incubated with RedDot in DPBS for 5 min and then the cells were observed using a confocal laser scanning microscope without washing. (Excitation wavelengths were 405 nm for Hoechst-N<sub>3</sub> and 640 nm for RedDot respectively)

**Imaging of A549 cells with various oxygen concentrations.** A549 cells were Incubated with 5  $\mu$ M of Hoechst-N<sub>3</sub> or 1  $\mu$ M of Cy-N<sub>3</sub> under various oxygen concentrations (0.3 and 21 %) for 30 min and 4 h respectively. Then, the medium was washed using DPBS twice and fluorescence images were obtained. For the imaging of hypoxic cells, we made hypoxic cells using Ruskinn Invivo 400. The cells were incubated under hypoxic conditions (0.3% O<sub>2</sub>) for 24 h using hypoxic chamber (Ruskinn Invivo 400) to be hypoxic cells. Then, the probes were added to the medium and the cells were further incubated under hypoxic conditions. After the cells were washed, the imaging by microscopy was conducted.

**Analysis of the location of enzymatic reduction for Hoechst-N<sub>3</sub> and Cy-N<sub>3</sub>.** A549 cells were incubated with 5  $\mu$ M Hoechst-N<sub>3</sub> or 1  $\mu$ M of Cy-N<sub>3</sub> under Aerobic conditions for 30 min. After washing with DPBS twice, A549 cells were further incubated in N<sub>2</sub> gas parged DMEM for 15 min. Then the medium was replaced by DPBS and fluorescence images were obtained.

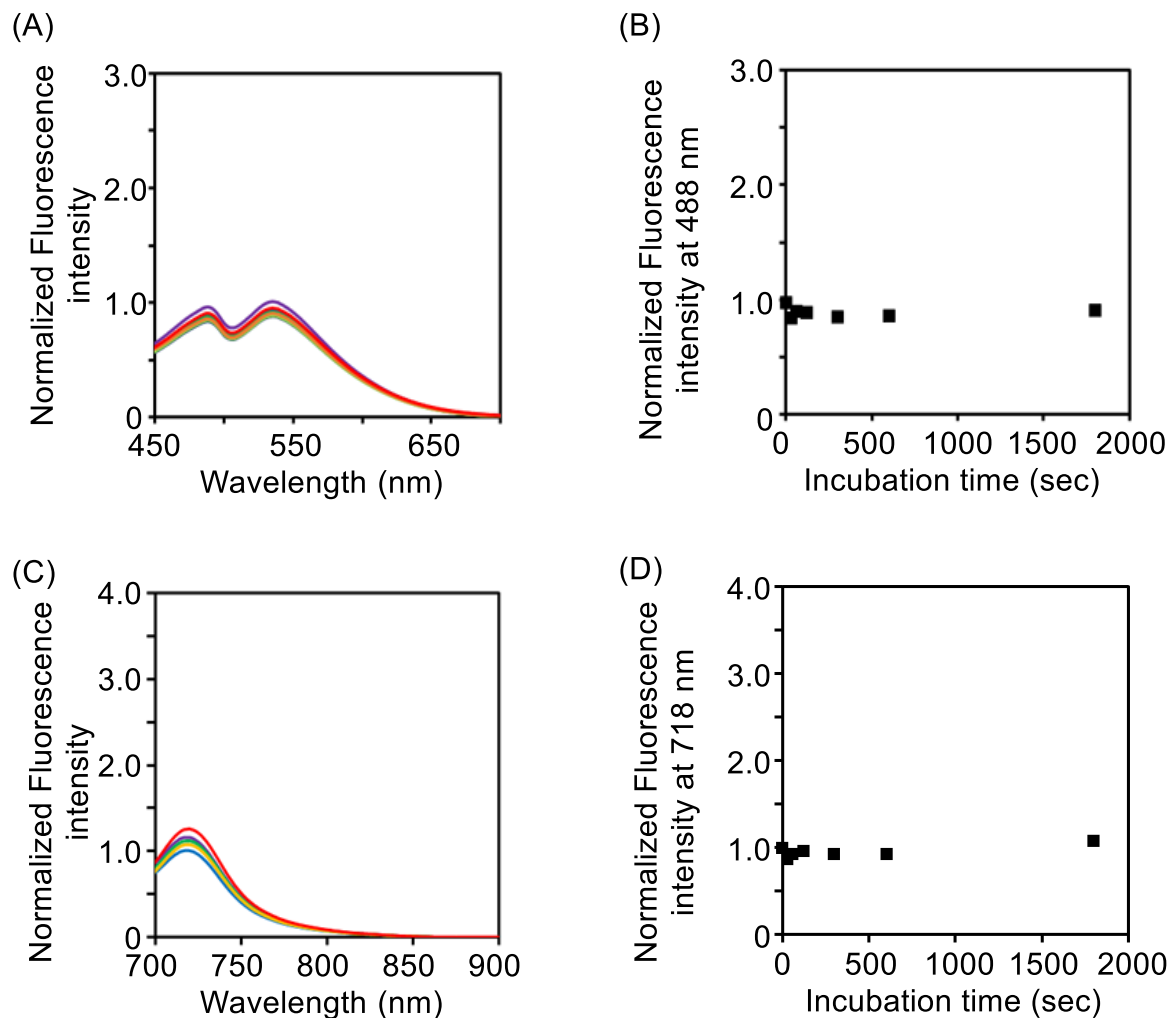

**Figure S1.** Fluorescence spectra of Hoechst-N<sub>3</sub> (A,B) and Cy-N<sub>3</sub> (C,D) after enzymatic reduction under 10% O<sub>2</sub> conditions: Hoechst-N<sub>3</sub> (500 nM) or Cy-N<sub>3</sub> (500 nM) were incubated with rat liver microsome (1.0 mg/mL) at 37 °C in phosphate buffer (pH 7.4) and then the fluorescence spectra were measured. Excitation wavelength was 405 and 685 nm for Hoechst-N<sub>3</sub> and Cy-N<sub>3</sub>, respectively. (A) Emission of Hoechst-N<sub>3</sub> upon enzymatic incubation for 0-1800 sec (purple: 0 min, dark blue: 30 sec, blue: 60 sec, green: 120 sec, light green: 300 sec, orange: 600 sec, red: 1800 sec) under 10% O<sub>2</sub> conditions. (B) Plot of fluorescence intensity of Hoechst-N<sub>3</sub> at 488 nm during enzymatic reaction. The data were obtained from Figure S1A. (C) Emission of Cy-N<sub>3</sub> upon enzymatic incubation for 0-30 min (purple: 0 min, dark blue: 30 sec, blue: 60 sec, green: 120 sec, light green: 300 sec, orange: 600 sec, red: 1800 sec) under 10% O<sub>2</sub> conditions. (D) Plot of fluorescence intensity of Cy-N<sub>3</sub> at 718 nm during enzymatic reaction. The data were obtained from Figure S1C.

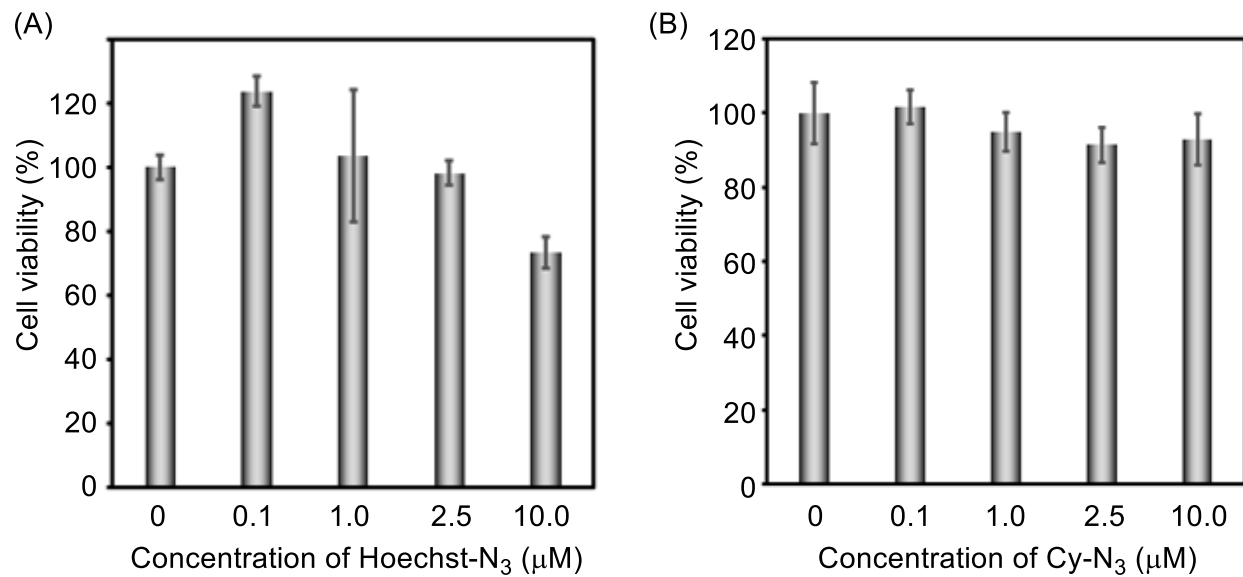

**Figure S2.** Cytotoxicity of Hoechst-N<sub>3</sub> (A) and Cy-N<sub>3</sub> (B) against A549 cells. The cells were cultured in the presence or absence of the probes (0, 0.1, 1.0, 2.5, and 10.0 μM) at the designated concentration for 24 h at 37 °C. Results are shown with the mean ± S.D (n = 3).

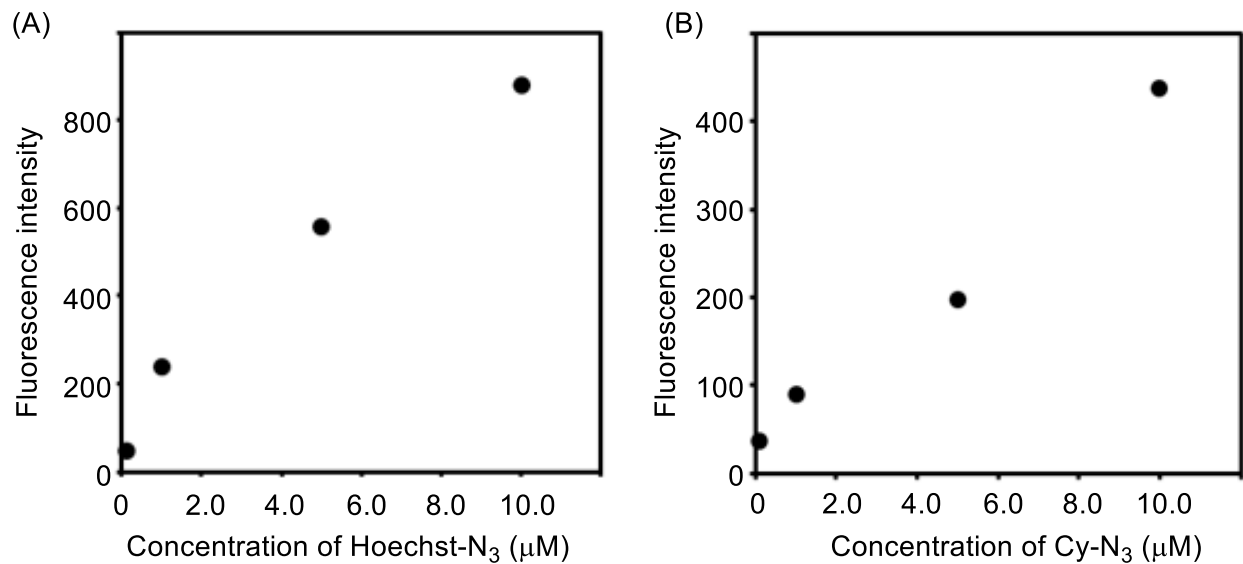

**Figure S3.** Fluorescence intensity of Hoechst-N<sub>3</sub> (A) and Cy-N<sub>3</sub> (B) in A549 cells under hypoxic conditions. The cells were cultured in the presence of the probes (0, 1.0, 5.0 and 10.0 μM) at the designated concentration for 0.5 h (A) or 4 h (B) at 37 °C. After wash, the cells were subjected to microscopy.

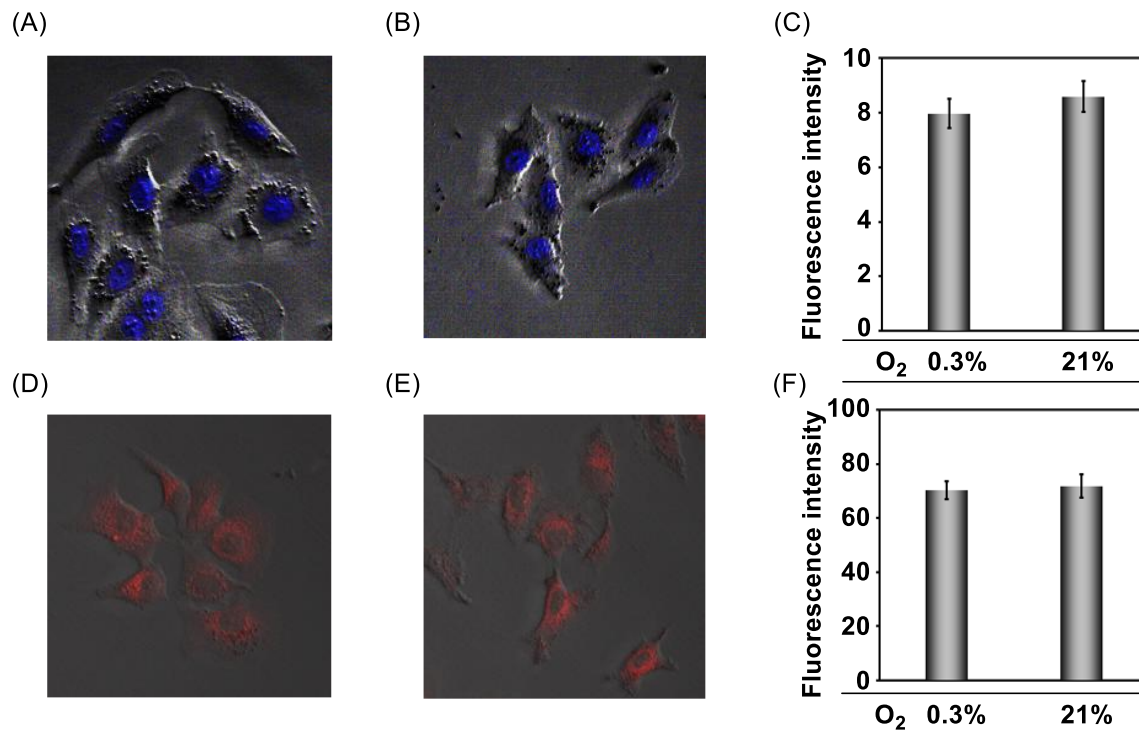

**Figure S4.** Fluorescence imaging of oxygenation of A549 cells, which was induced by change of medium. The cells were loaded with reduction products of Hoechst-N<sub>3</sub> (5  $\mu$ M, A, B and C) and Cy-N<sub>3</sub> (1  $\mu$ M, D, E and F), and then incubated (for A and B: 30 min, for D and E: 4 h) under hypoxic conditions (0.3% O<sub>2</sub>). Then, the medium was replaced by fresh medium which were kept under the 21% oxygen concentrations and the cells were further incubated under aerobic conditions for 10 min. Before (A and D) and after (B and E) the replacement, the images were taken by means of microscopy. (C) Fluorescence intensity before and after stimulation. Fluorescence intensities (417-477 nm) were obtained from obtained from Figure S4A and S4B. (F) Fluorescence intensity before and after stimulation. Fluorescence intensities (640-1000 nm) were obtained from obtained from Figure S4D and S4E.

(A) Hoechst-N3+Cy-N3 (0.3% O<sub>2</sub>)

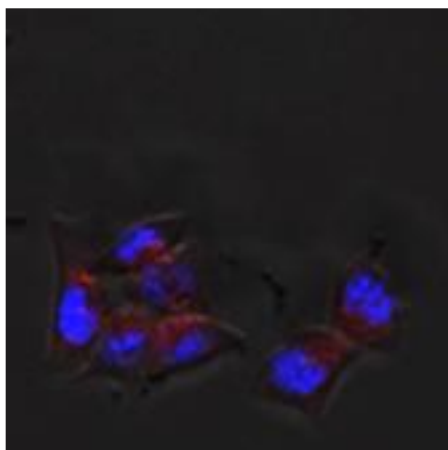

(B) Hoechst-N3+Cy-N3 (21% O<sub>2</sub>)

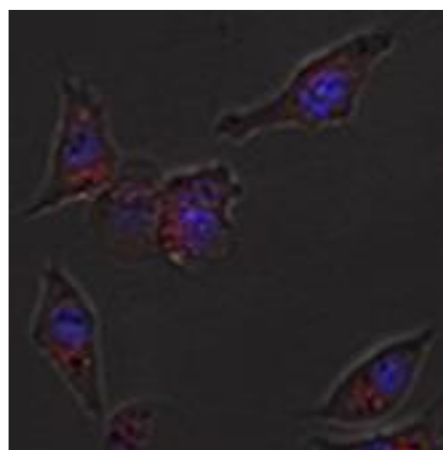

**Figure S5.** Emission images of HCT116 cells as incubated with Hoechst-N<sub>3</sub> and Cy-N<sub>3</sub>. The cells were incubated with Hoechst-N<sub>3</sub> (5 μM) and Cy-N<sub>3</sub> (1 μM) under hypoxic (A: 0.3% O<sub>2</sub>) or aerobic conditions (B: 21% O<sub>2</sub>) and then, the images were immediately taken by means of confocal microscopy. Excitation wavelengths were 405 and 640 nm for Hoechst-N<sub>3</sub> (blue) and Cy-N<sub>3</sub> (red), respectively.



(A) Hoechst-N3+Cy-N3 (0.3% O<sub>2</sub>)

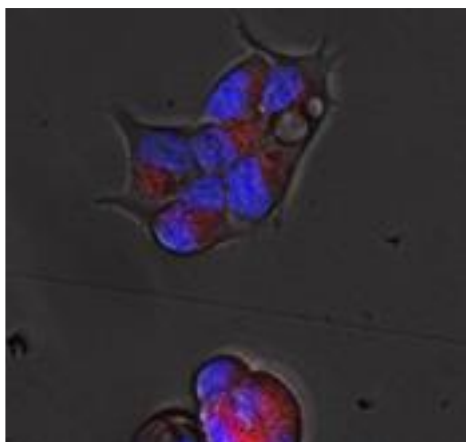

(B) Hoechst-N3+Cy-N3 (21% O<sub>2</sub>)

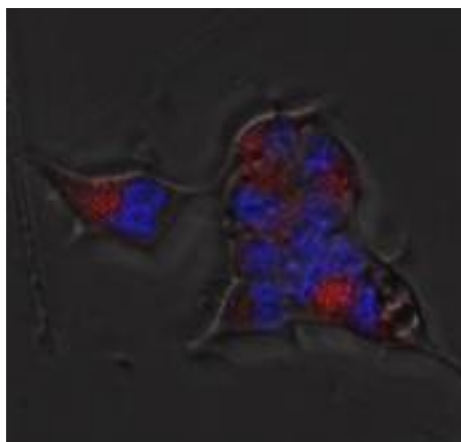

**Figure S6.** Emission images of HEK293 cells as incubated with Hoechst-N<sub>3</sub> and Cy-N<sub>3</sub>. The cells were incubated with Hoechst-N<sub>3</sub> (5 μM) and Cy-N<sub>3</sub> (1 μM) under hypoxic (A: 0.3% O<sub>2</sub>) or aerobic conditions (B: 21% O<sub>2</sub>) and then, the images were immediately taken by means of confocal microscopy. Excitation wavelengths were 405 and 640 nm for Hoechst-N<sub>3</sub> (blue) and Cy-N<sub>3</sub> (red), respectively.

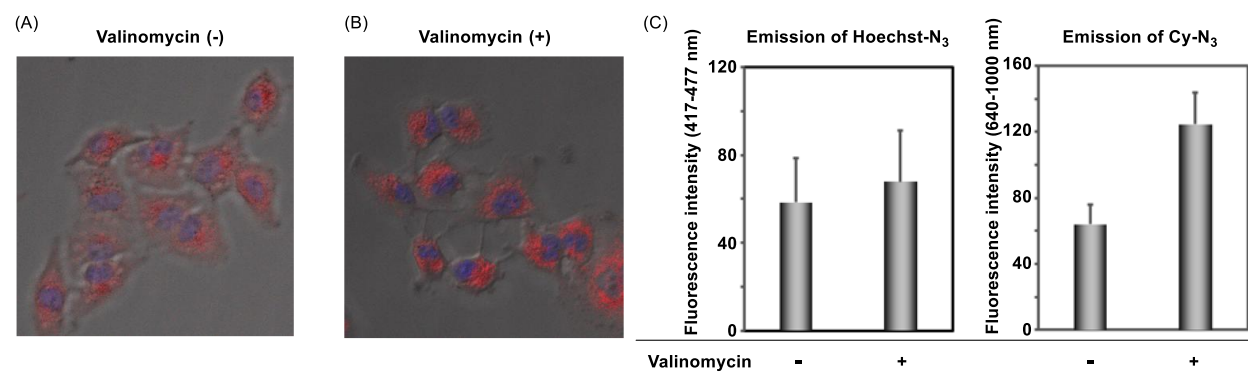

**Figure S7.** Fluorescence imaging of deoxygenation of A549 cells, which was induced by mitochondrial uncoupler (valinomycin, 1  $\mu\text{M}$ ) stimulation. The cells were loaded with Hoechst-N<sub>3</sub> (5  $\mu\text{M}$ ) and Cy-N<sub>3</sub> (1  $\mu\text{M}$ ), and then incubated for 30 min. After incubation, the cells were stimulated by valinomycin. (A,B) Fluorescence image of the cells before stimulation (A) and after stimulation (B) by valinomycin. Excitation wavelength was 405 and 640 nm for Hoechst-N<sub>3</sub> (blue) and Cy-N<sub>3</sub> (red), respectively. (C) Fluorescence intensity before and after stimulation. Fluorescence intensity of Hoechst-N<sub>3</sub> (left, 417-477 nm) and that of Cy-N<sub>3</sub> (right, 640-1000 nm) were obtained from Figure S3A and S3B.

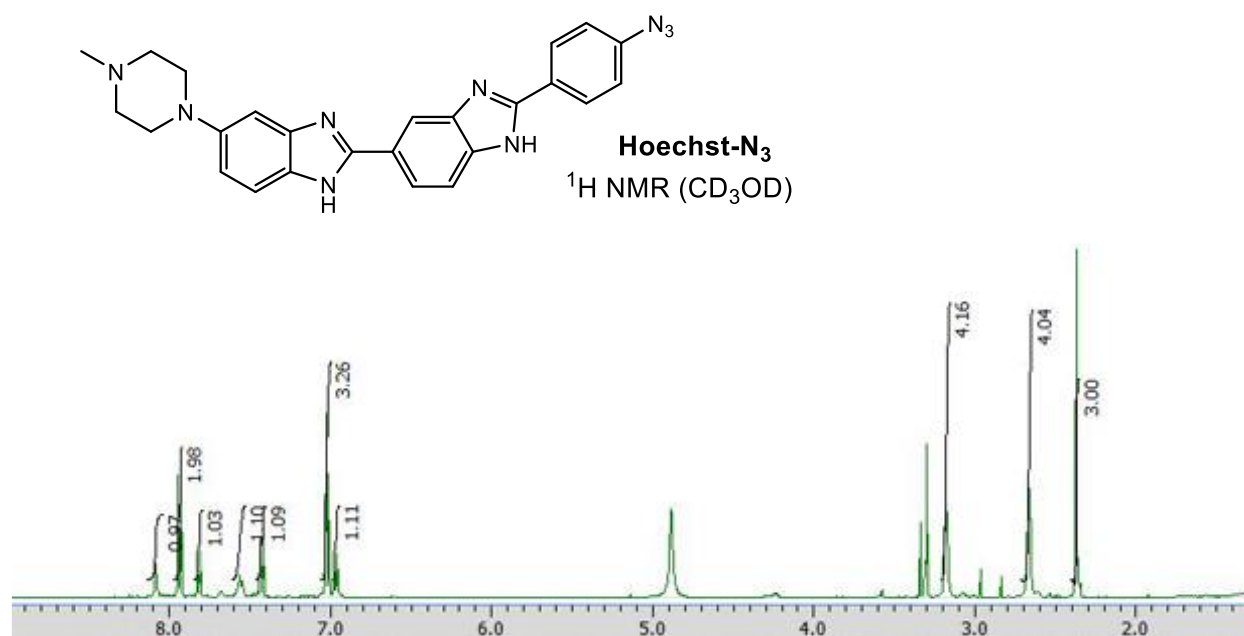

**Figure S8.** <sup>1</sup>H NMR spectrum of Hoechst-N<sub>3</sub>.

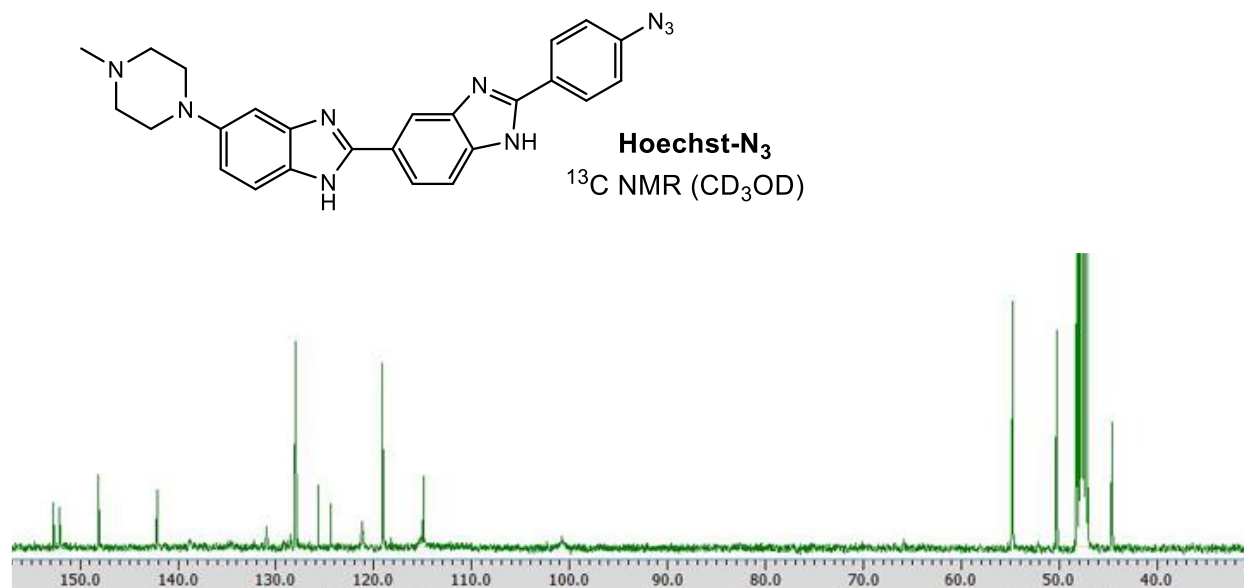

**Figure S9.** <sup>13</sup>C NMR spectrum of Hoechst-N<sub>3</sub>.
